# Supplementary figures and images for: Synthesis and Crystal Structure of the Zintl Phases Na2CaCdSb2, Na2SrCdSb2 and Na2EuCdSb2
Source: MDPI journal article supplement (doi:10.3390/inorganics10120265), 2022-12-18

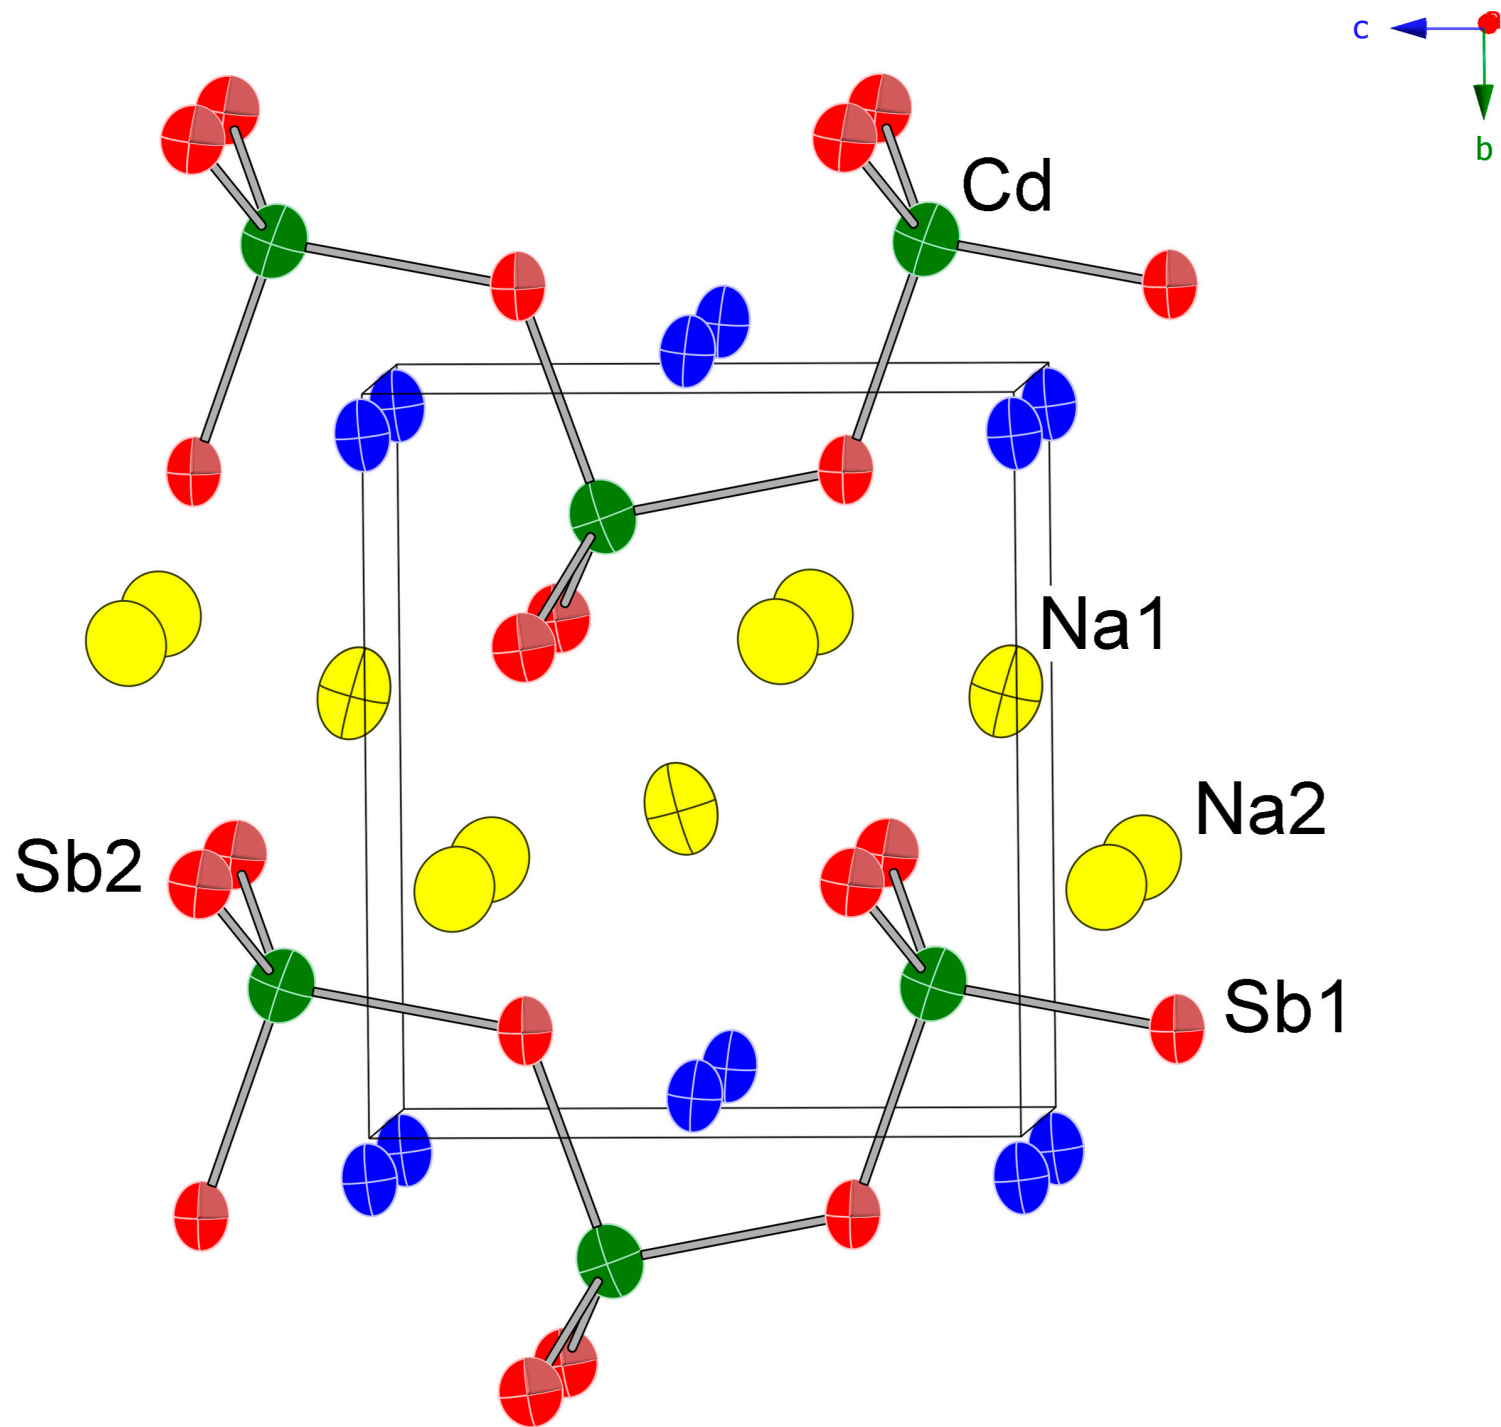

Supplement: s1 [file s1]
